# Supplementary material
Source: PubMed Central journal article supplement (PMC8505513)
Supplement: 41416_2021_1511_MOESM1_ESM.pdf [file 41416_2021_1511_MOESM1_ESM.pdf]

## 河南省人民医院医学伦理委员会批件

(2019) 伦审第 (68) 号

|                                                                                                                                                                                                                                                                                                                 |                                                                                                                                                                                  |      |         |
|-----------------------------------------------------------------------------------------------------------------------------------------------------------------------------------------------------------------------------------------------------------------------------------------------------------------|----------------------------------------------------------------------------------------------------------------------------------------------------------------------------------|------|---------|
| 项目名称                                                                                                                                                                                                                                                                                                            | 基于人工智能的影像数据诊断研究                                                                                                                                                                  |      |         |
| 研究者                                                                                                                                                                                                                                                                                                             | 王梅云 主任医师                                                                                                                                                                         | 承担科室 | 影像科     |
| 申办单位                                                                                                                                                                                                                                                                                                            | 河南省人民医院                                                                                                                                                                          | 组长单位 | 河南省人民医院 |
| 评审材料                                                                                                                                                                                                                                                                                                            | 1. 初始审查申请                                                                                                                                                                        |      |         |
|                                                                                                                                                                                                                                                                                                                 | 2. 研究方案 (1.0 版, 2019 年 7 月 31 日)                                                                                                                                                 |      |         |
|                                                                                                                                                                                                                                                                                                                 | 3. 可行性安全性论证报告                                                                                                                                                                    |      |         |
|                                                                                                                                                                                                                                                                                                                 | 4. 免除知情同意书申请 (1.0 版, 2019 年 7 月 31 日)                                                                                                                                            |      |         |
|                                                                                                                                                                                                                                                                                                                 | 5. 病例报告表 (1.0 版, 2019 年 7 月 31 日)                                                                                                                                                |      |         |
|                                                                                                                                                                                                                                                                                                                 | 6. 研究人员名单                                                                                                                                                                        |      |         |
|                                                                                                                                                                                                                                                                                                                 | 7. 研究者简历                                                                                                                                                                         |      |         |
|                                                                                                                                                                                                                                                                                                                 | 空格                                                                                                                                                                               |      |         |
|                                                                                                                                                                                                                                                                                                                 | 空格                                                                                                                                                                               |      |         |
| 审查模式                                                                                                                                                                                                                                                                                                            | 会议审查 <input checked="" type="checkbox"/> 快速审查 <input type="checkbox"/>                                                                                                           |      |         |
| 审查结果                                                                                                                                                                                                                                                                                                            | 审查委员: 邵凤民、王宇明、李立、张晓菊、马建军、高尚刚、王志立、高永举、戴付敏、史大鹏                                                                                                                                     |      |         |
|                                                                                                                                                                                                                                                                                                                 | 其中: 同意 <u>10</u> 票, 做必要修改后同意 <u>0</u> 票, 作必要修改后重新上会 <u>0</u> 票, 回避 <u>0</u> 票, 不同意 <u>0</u> 票, 暂停或终止已批准的研究 <u>0</u> 票                                                            |      |         |
|                                                                                                                                                                                                                                                                                                                 | 结论: 同意 <input checked="" type="checkbox"/> 作必要修改后同意 <input type="checkbox"/> 作必要修改后上会 <input type="checkbox"/> 不同意 <input type="checkbox"/> 暂停或终止已批准的研究 <input type="checkbox"/> |      |         |
| 年度/定期跟踪审查日期                                                                                                                                                                                                                                                                                                     | 请于 2020 年 8 月 16 日前 (提前一个月) 提交年度进展报告                                                                                                                                             |      |         |
| 批件有效期                                                                                                                                                                                                                                                                                                           | 2019 年 8 月 16 日至 2020 年 8 月 16 日                                                                                                                                                 |      |         |
| <p>评审意见:</p> <p>伦理委员会已经通过审核评审材料, 对研究方案及知情同意书等材料进行严格审核, 我伦理委员会认为符合伦理规范, 同意进行临床研究, 并强调在研究进行过程中要严格告知、充分保证受试者的权益。</p> <p style="text-align: right;">主任委员 (或被授权者) 签名: 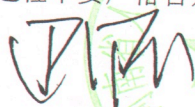</p> <p style="text-align: right;">日期: 2019 年 8 月 16 日</p> |                                                                                                                                                                                  |      |         |
| <p>伦理委员会申明:</p> <p>1. 河南省人民医院医学伦理委员会组成及工作程序遵循 ICH-GCP 及中国 GCP 等相关法律法规。</p> <p>2. 伦理委员会委员已签署同意信守机密, 并同意该信息只以伦理审查为目的, 不用于其他目的或公开给第三方。提供审查的书面机密资料不能被复制或保留。所有标准操作规程、机密信息、摘记等及其副本的所有权均归伦理委员会。</p>                                                                                                                    |                                                                                                                                                                                  |      |         |
