# Supplementary material
Source: PubMed Central journal article supplement (PMC8505513)
Supplement: 41416_2021_1511_MOESM7_ESM.pdf [file 41416_2021_1511_MOESM7_ESM.pdf]

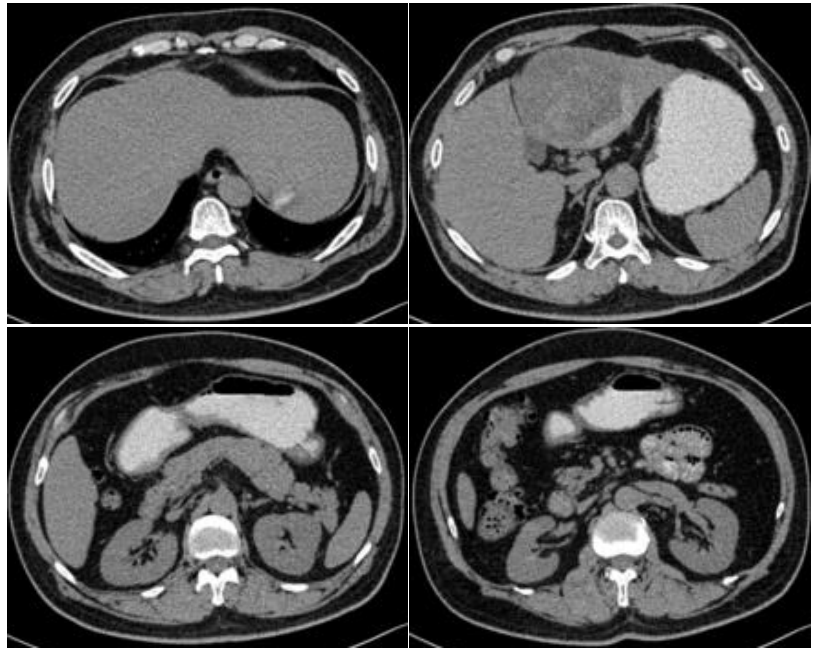

512 × 512

Identification of HCC  
by HCCNet

Stage 1

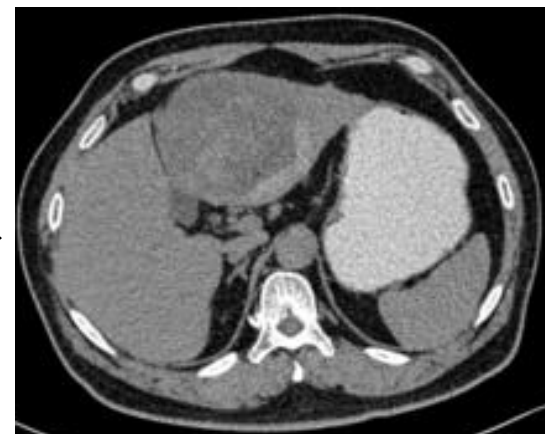

256 × 256

Differentiation of tumor mass  
by NoduleNet

Stage 2

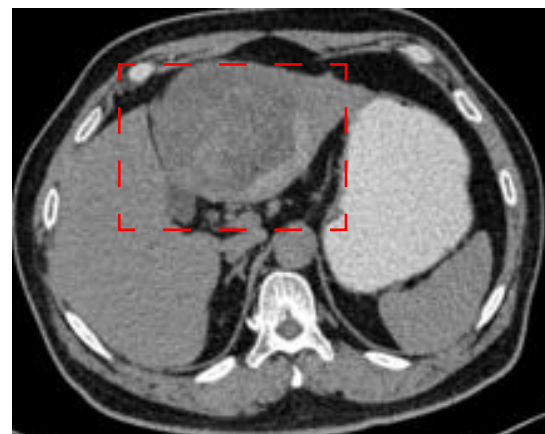

256 × 256

Prediction results  
by heatmaps

Stage 3

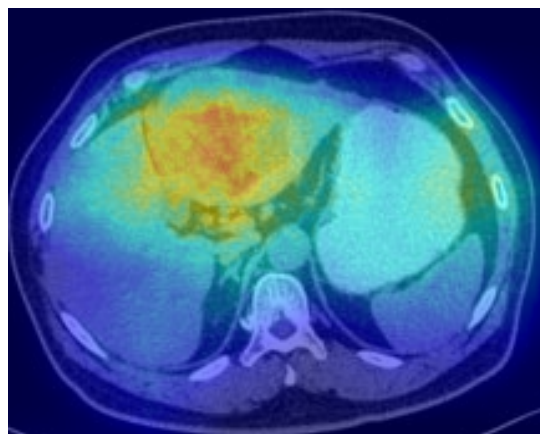

256 × 256
