# Supplementary material
Source: PubMed Central journal article supplement (PMC8505513)
Supplement: 41416_2021_1511_MOESM11_ESM.pdf [file 41416_2021_1511_MOESM11_ESM.pdf]

**CT image**

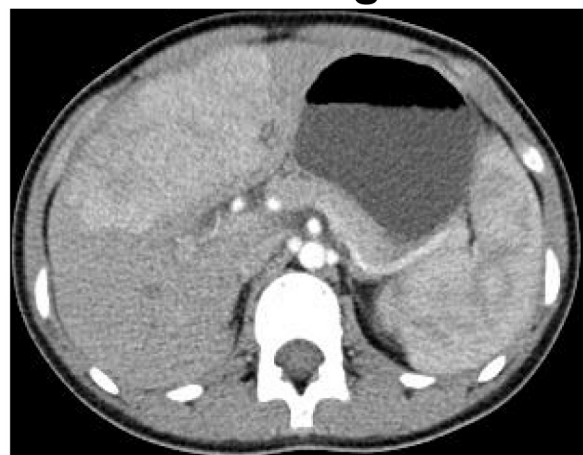

**Saliency map**

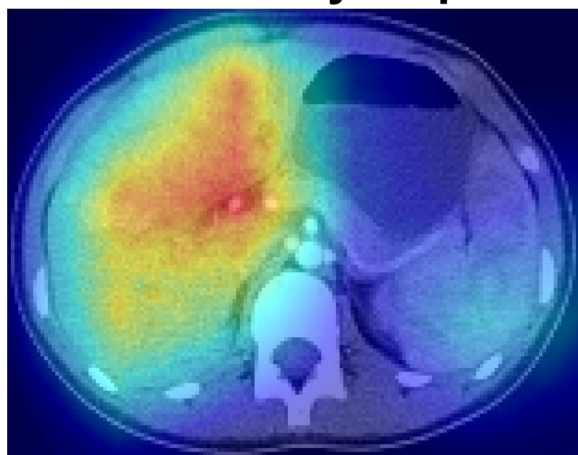

**H&E(100X)**

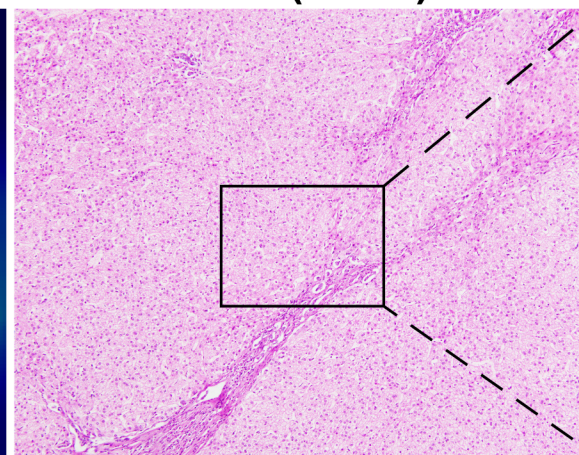

**H&E(400X)**

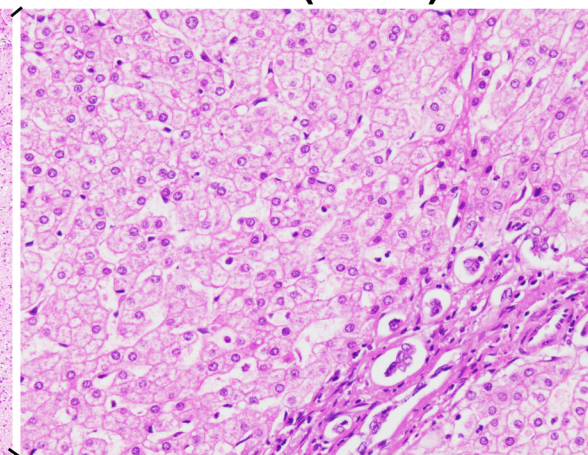

**Focal nodular hyperplasia**

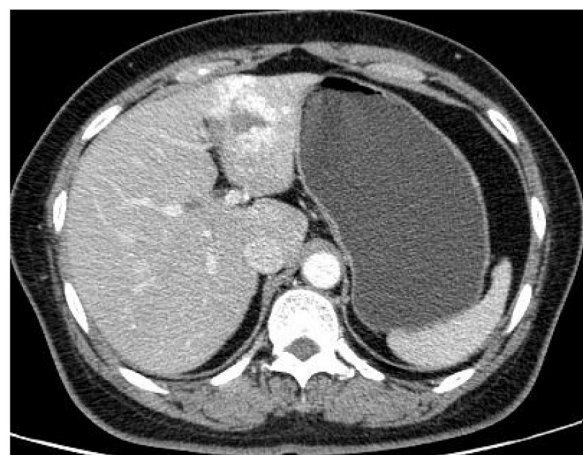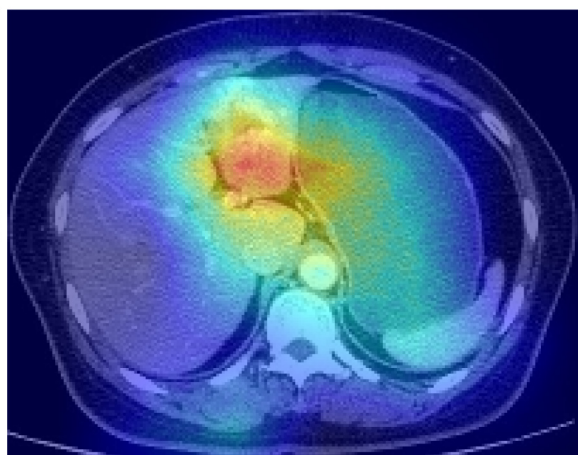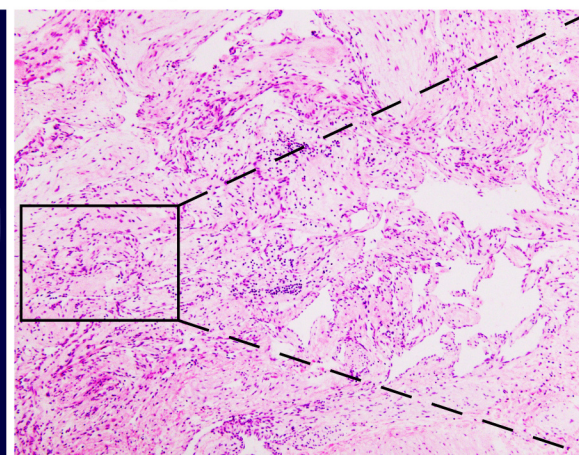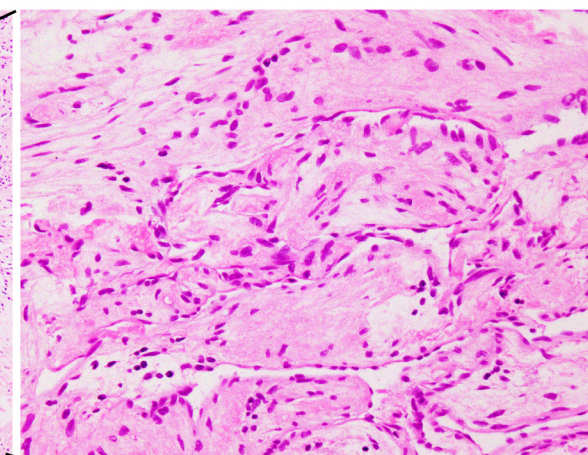

**Hemangioma**

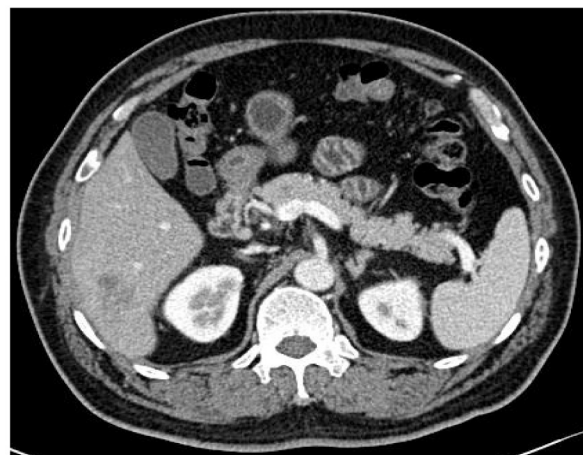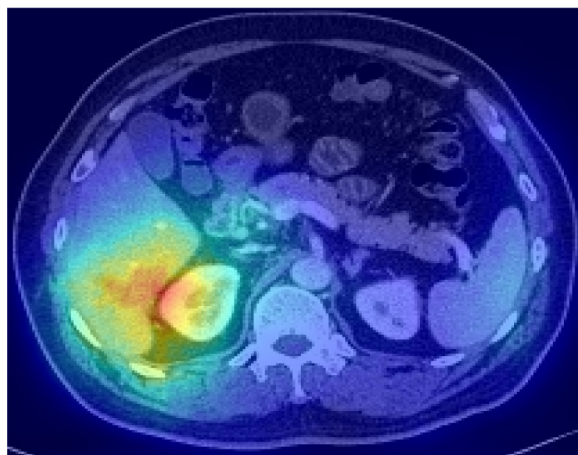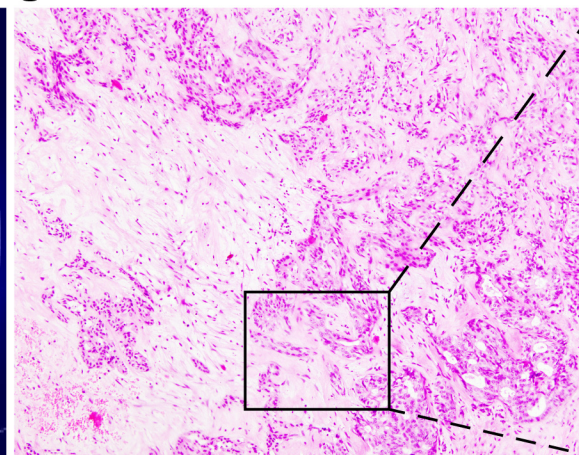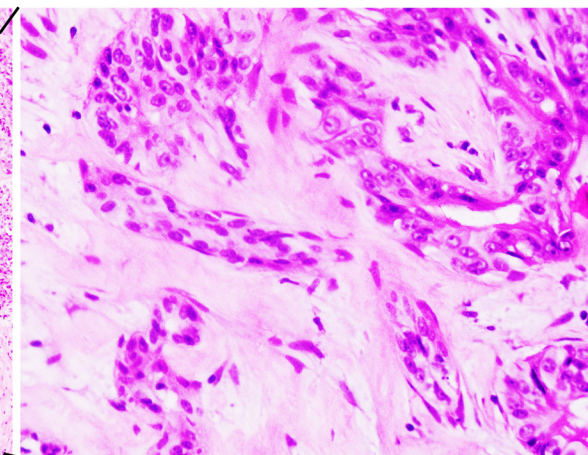

**Intrahepatic cholangiocarcinoma**

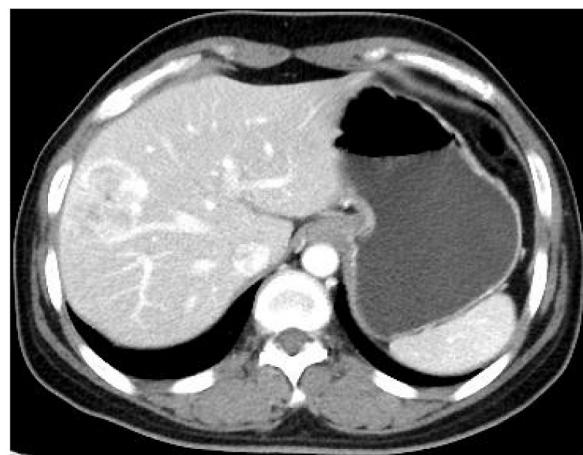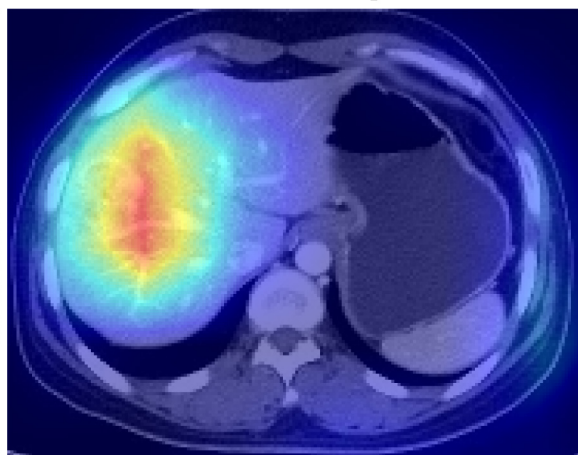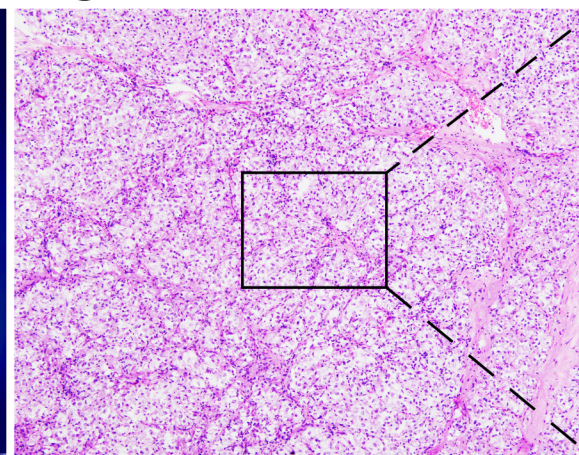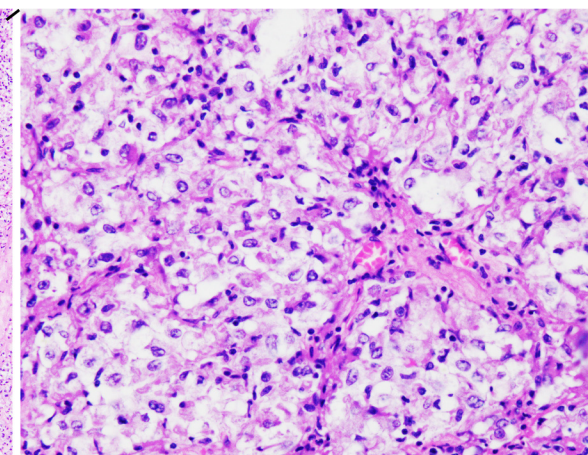

**Angioleiomyolipoma**
