# Supplementary material
Source: PubMed Central journal article supplement (PMC8505513)

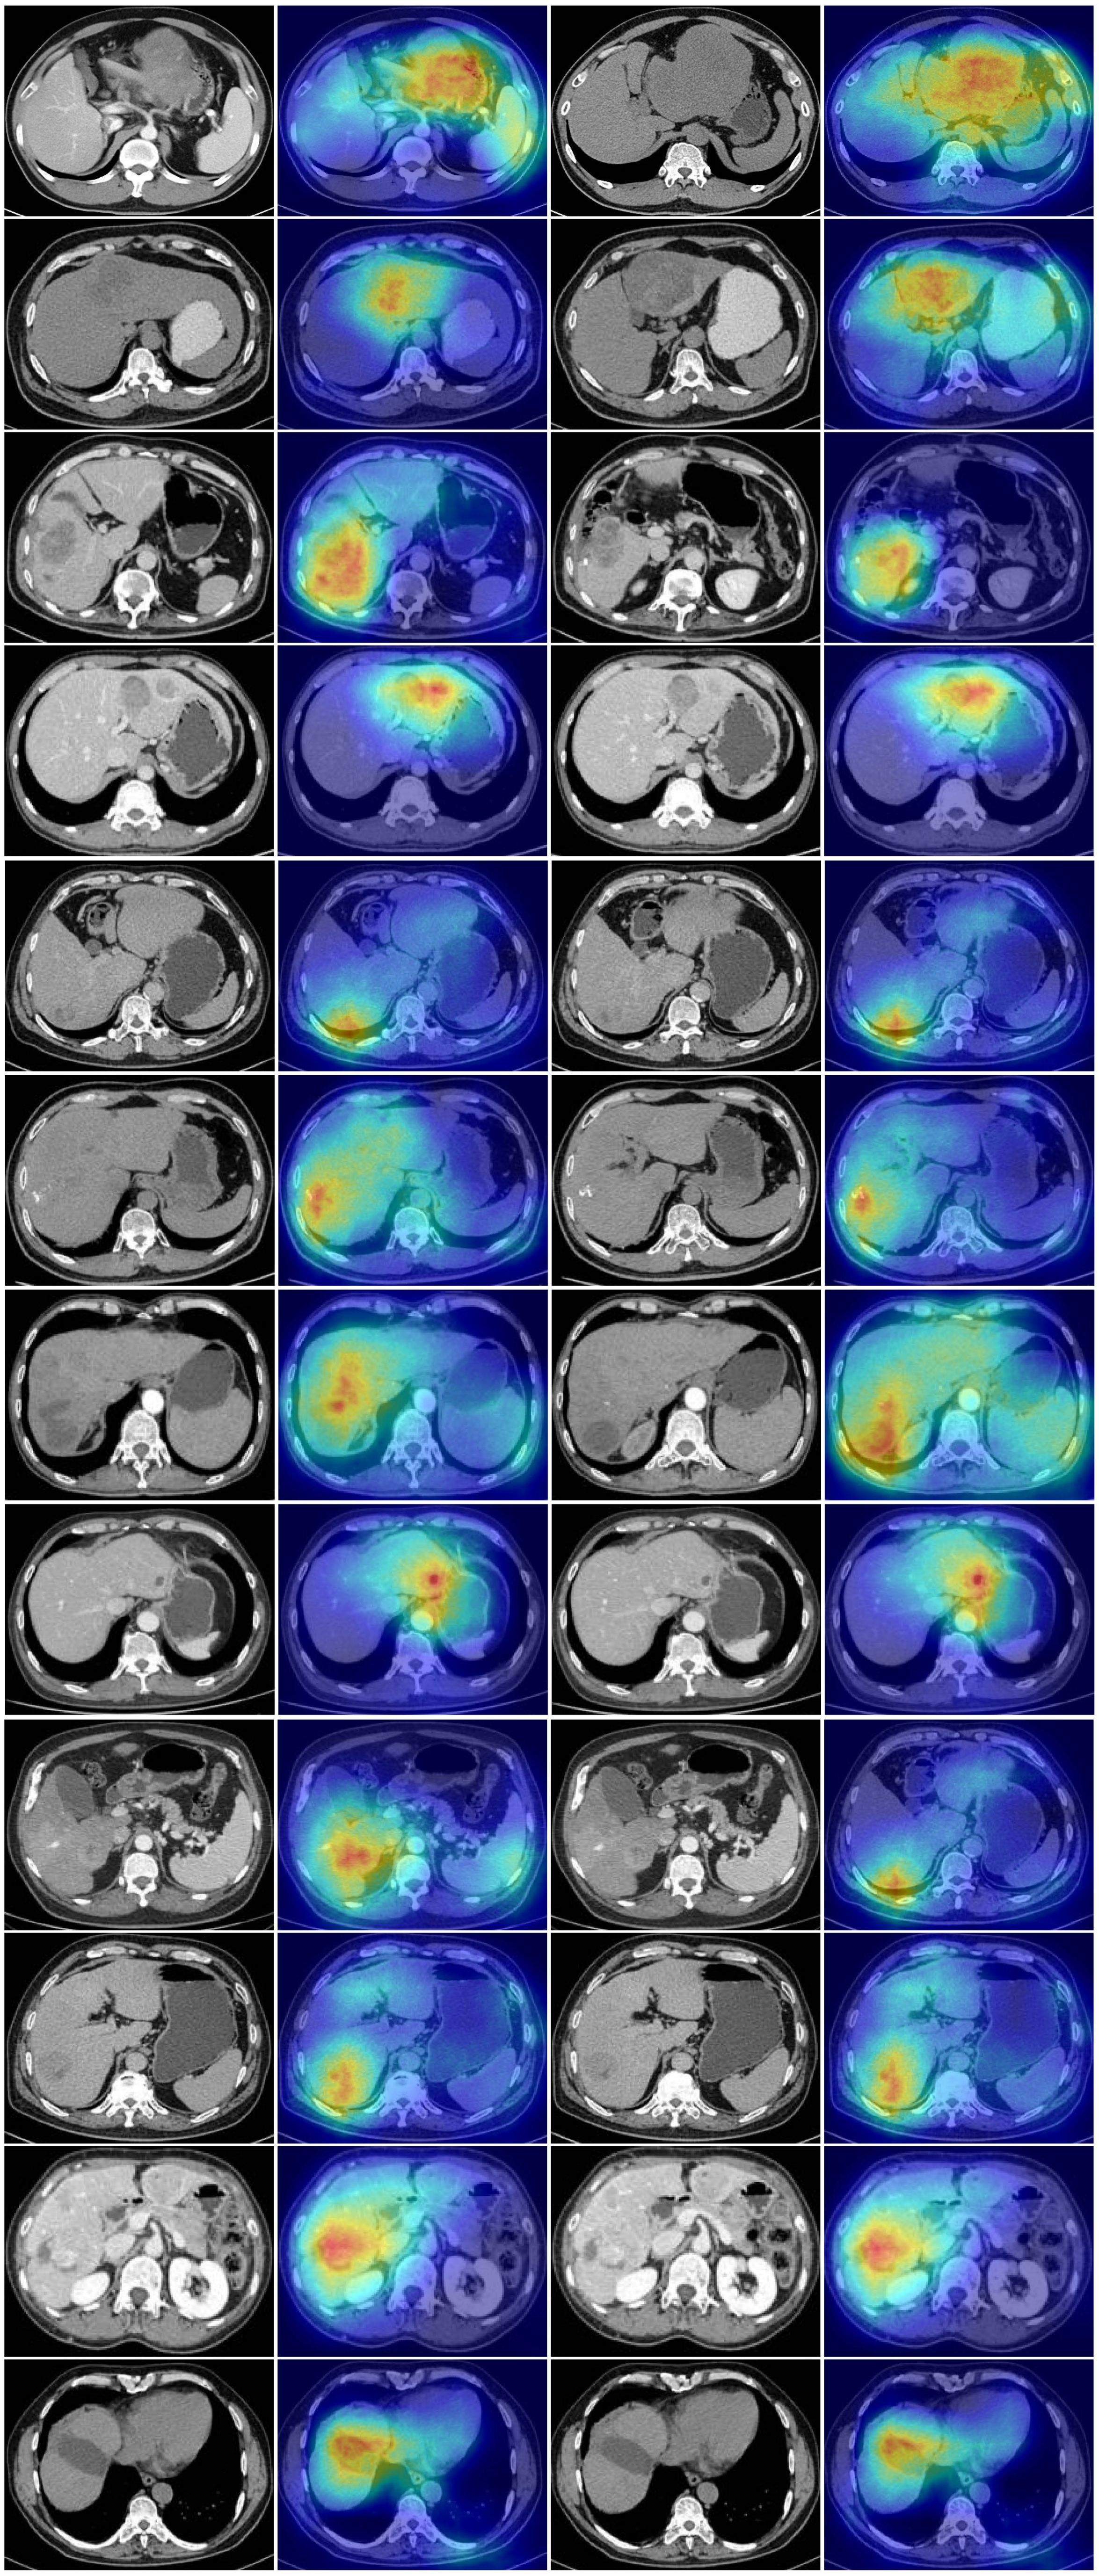

Supplement: 41416_2021_1511_MOESM10_ESM.pdf [file 41416_2021_1511_MOESM10_ESM.pdf]

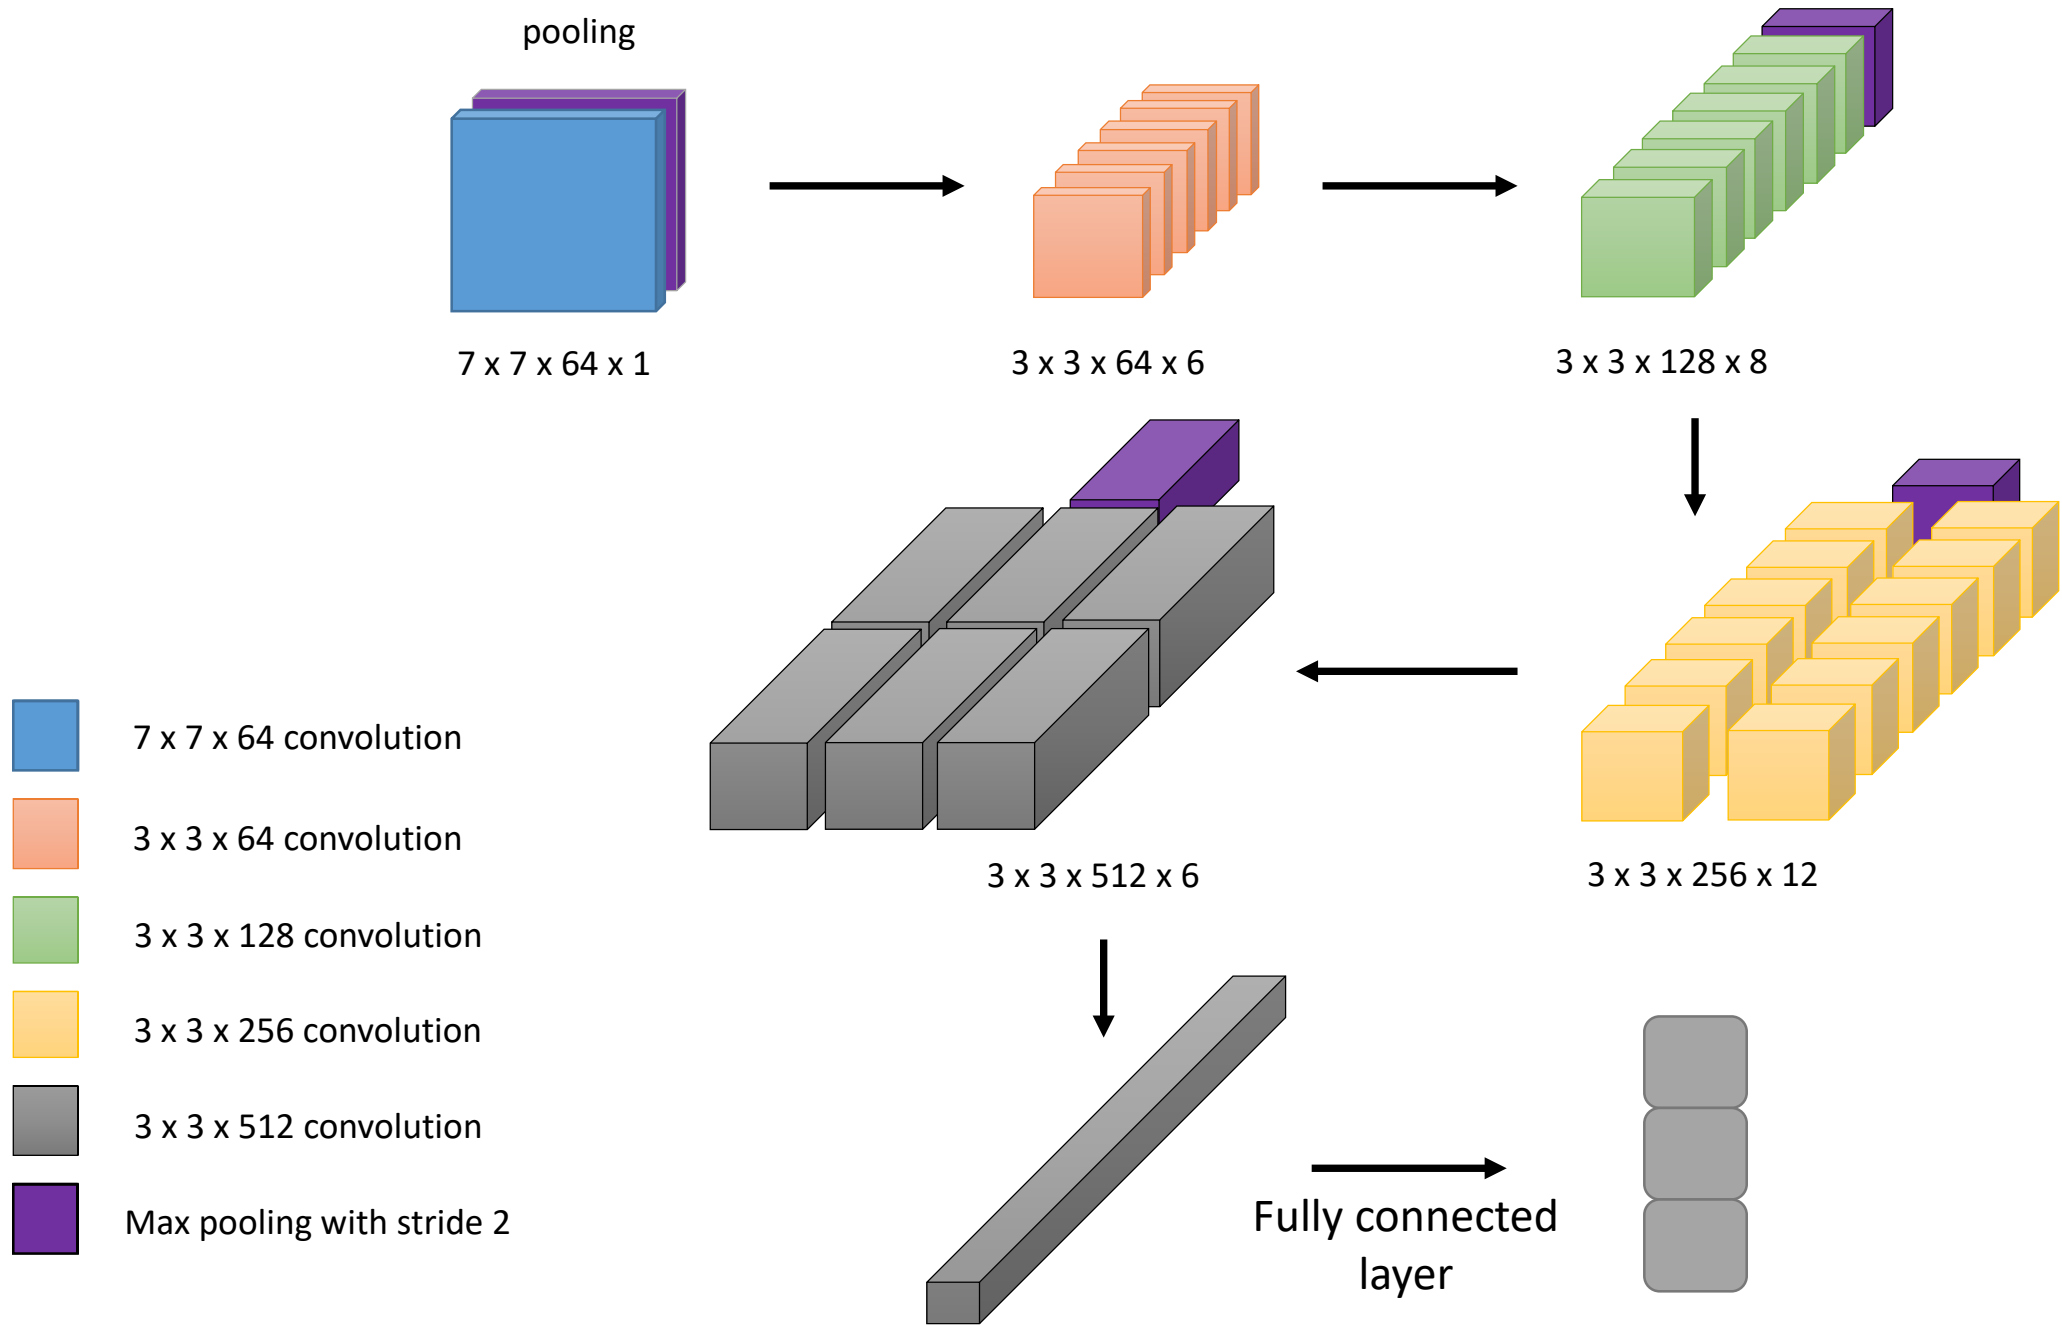

Supplement: 41416_2021_1511_MOESM5_ESM.pdf [file 41416_2021_1511_MOESM5_ESM.pdf]

# AUROC

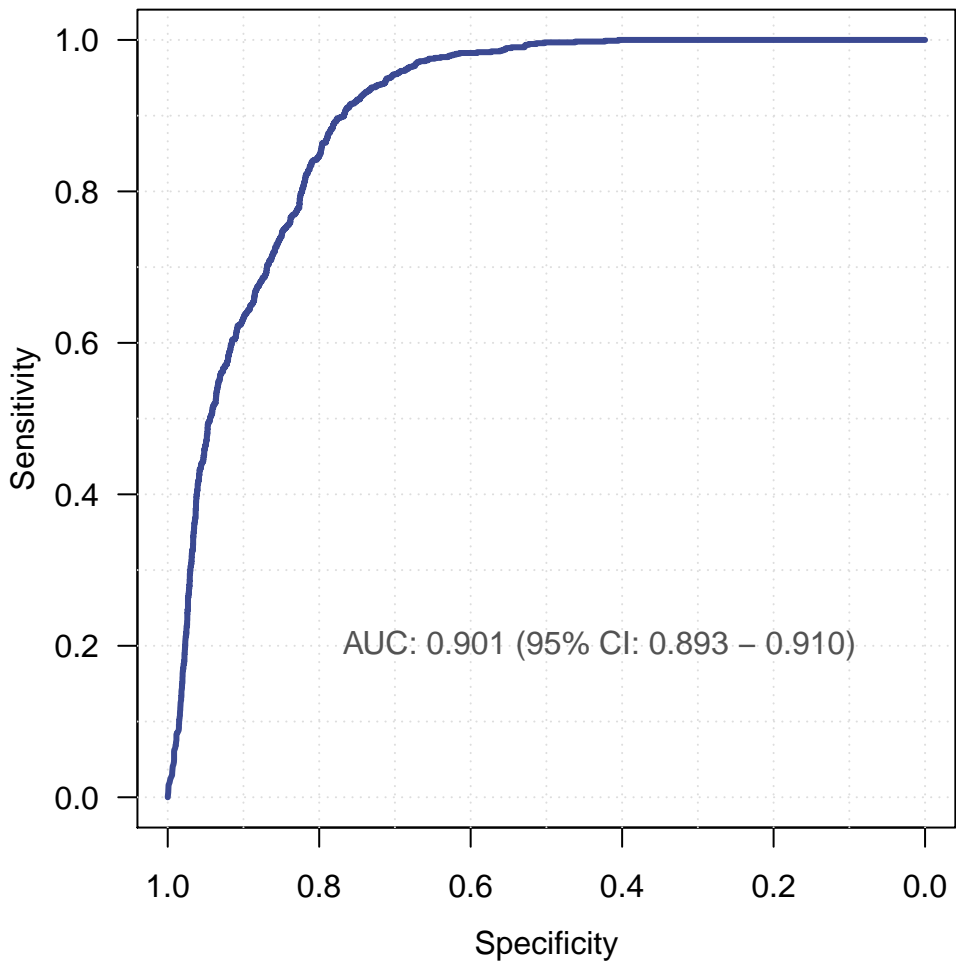

Supplement: 41416_2021_1511_MOESM8_ESM.pdf [file 41416_2021_1511_MOESM8_ESM.pdf]

Internal test set

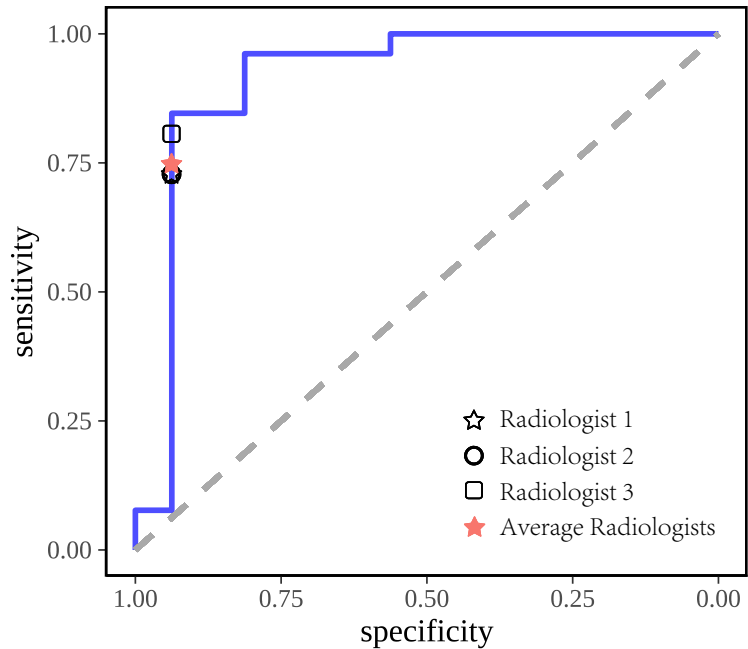

External test set

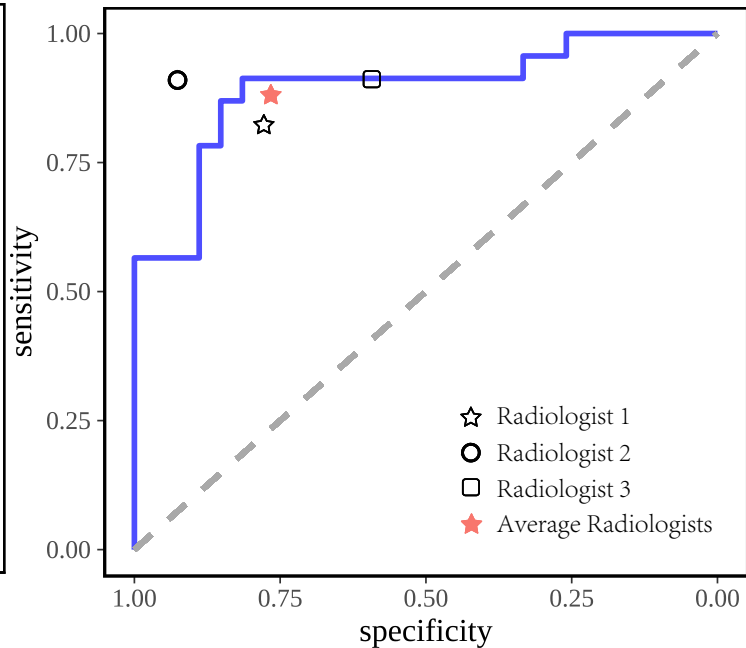

Supplement: 41416_2021_1511_MOESM9_ESM.pdf [file 41416_2021_1511_MOESM9_ESM.pdf]
